# Supplementary material for: Triflumizole Induces Developmental Toxicity, Liver Damage, Oxidative Stress, Heat Shock Response, Inflammation, and Lipid Synthesis in Zebrafish
Source: MDPI journal article supplement (doi:10.3390/toxics10110698), 2022-11-17
Supplement: s1 [file s1]

Table S1: The sequence of primers for qPCR.

| Species                               | Primer              | Sequence (5' → 3')          | Reference  |
|---------------------------------------|---------------------|-----------------------------|------------|
| Zebrafish                             | <i>hsp70</i> -F     | GGAGAAAGCACTGAGGGACG        | [42]       |
|                                       | <i>hsp70</i> -R     | CTCTGCCGTTGAAGAAATCC        |            |
|                                       | <i>grp78</i> -F     | AAGAGGCCGAAGAGAAGGAC        | [43]       |
|                                       | <i>grp78</i> -R     | AGCAGCAGAGCCTCGAAATA        |            |
|                                       | <i>hsp90</i> -F     | TCAGTTCATCGGTTACCCAAT       | [42]       |
|                                       | <i>hsp90</i> -R     | TTTGTCTTTGTCTTCGCCTG        |            |
|                                       | <i>grp94</i> -F     | ATGGCACCAAGAAGAATGACTT      | [43]       |
|                                       | <i>grp94</i> -R     | GCACCAGCTTTTTACGGATAAC      |            |
|                                       | <i>tnfα</i> -F      | GCTGGATCTTCAAAGTCGGGTGTA    | [44]       |
|                                       | <i>tnfα</i> -R      | TGTGAGTCTCAGCACACTTCCATC    |            |
|                                       | <i>p65-nfkb</i> -F  | GCTGGATCTTCAAAGTCGGGTGTA    | [45]       |
|                                       | <i>p65-nfkb</i> -R  | CAGTCTTTTCCCACCAGCTC        |            |
|                                       | <i>il-1β</i> -F     | CATTTGCAGGCCGTCACA          | [46]       |
|                                       | <i>il-1β</i> -R     | GGACATGCTGAAGCGCACTT        |            |
|                                       | <i>cox2a</i> -F     | ACTACCCCTGAGCTTCTCACA       | [47]       |
|                                       | <i>cox2a</i> -R     | GATGCTGTTGATGATATCCCAGATTG  |            |
|                                       | <i>cox2b</i> -F     | GGCTCATCCTTATTGGTGAGACTAT   | [47]       |
|                                       | <i>cox2b</i> -R     | TCGGGATCAAACCTTGAGCTTAAAATA |            |
|                                       | <i>srebp1</i> -F    | GCTAGTTTTTCATGGAATAACGC     | [48]       |
|                                       | <i>srebp1</i> -R    | CATTGAGAAGGGCAGTGTCG        |            |
|                                       | <i>fas</i> -F       | TGTTGCGTCTTGACTACACTGC      | [49]       |
|                                       | <i>fas</i> -R       | ATAAAGCCCCCTTCCCTCG         |            |
|                                       | <i>acc</i> -F       | ACCCCAACAGAGGGAACA          | [49]       |
|                                       | <i>acc</i> -R       | AAGAGCGGAAGGAAACCA          |            |
|                                       | <i>ppar-γ</i> -F    | TCTCCGCTGATATGGTGGAC        | [50]       |
|                                       | <i>ppar-γ</i> -R    | GTCGATGCCTGATATGCTGC        |            |
|                                       | <i>β-actin</i> -F   | TGCTGTTTTCCCCTCCATTG        | [46]       |
|                                       | <i>β-actin</i> -R   | TTCTGTCCCATGCCAACCA         |            |
| Intestine cell line of silver pomfret | <i>hsp70</i> -F     | GGAAGCCCAAGATTCAAGTG        | By authors |
|                                       | <i>hsp70</i> -R     | GACTGTGATGACTGCGTTG         |            |
|                                       | <i>grp78</i> -F     | ATCACAAACGACCAGAACCG        | By authors |
|                                       | <i>grp78</i> -R     | CGCCAGCACTGCCATAAAG         |            |
|                                       | <i>hsp90</i> -F     | GAATCACACGACCACGCGA         | By authors |
|                                       | <i>hsp90</i> -R     | TGAGGTCCTTGCCAGTGTC         |            |
|                                       | <i>grp94</i> -F     | TGCTCCACATCACCGACAC         | By authors |
|                                       | <i>grp94</i> -R     | GGAAAGCAGAGTAGAAACCC        |            |
|                                       | <i>p65-nfkb</i> -F  | GAAATGGCGCCTCAGTGTTG        | By authors |
|                                       | <i>p65-nfkb</i> -R  | TGCTGGAGCAAGTTGACGAT        |            |
|                                       | <i>p105-nfkb</i> -F | AGAACGTGGCGAAGACTCTG        | By authors |
|                                       | <i>p105-nfkb</i> -R | CCACGCTGAGGTCCATTCT         |            |

|                   |                       |            |
|-------------------|-----------------------|------------|
| <i>cox2</i> -F    | CTTCGCACAGCACTTCACAC  | By authors |
| <i>cox2</i> -R    | CTGAGATTCGGGGACGTGAG  |            |
| <i>srebp1</i> -F  | CAGGACATGGAGTTTGGAGG  | By authors |
| <i>srebp1</i> -R  | AGGATGGAGGACTTGGAT    |            |
| <i>lpl</i> -F     | CCCTGCGTTTTTCACCTTGTG | [51]       |
| <i>lpl</i> -R     | TGCGAAGGAAGGGGAGTTTG  |            |
| <i>ppar-γ</i> -F  | TGGAAGGGGAGCAGTTCATT  | [51]       |
| <i>ppar-γ</i> -R  | CGTCTCCTGTCTGCTGATGT  |            |
| <i>ppar-α</i> -F  | CCACTACCAACCCCCTTCAC  | [51]       |
| <i>ppar-α</i> -R  | GGAGCTAAGGACGCTGTTGT  |            |
| <i>β-actin</i> -F | ACCCTGAAGTACCCCATCGA  | By authors |
| <i>β-actin</i> -R | GGCCACTCTCAGCTCATTGT  |            |
